# Supplementary material for: The Brown Alga Bifurcaria bifurcata Presents an Anthelmintic Activity on All Developmental Stages of the Parasitic Nematode Heligmosomoides polygyrus bakeri
Source: MDPI journal article supplement (doi:10.3390/pathogens12040540), 2023-03-30
Supplement: s1 [file s1]

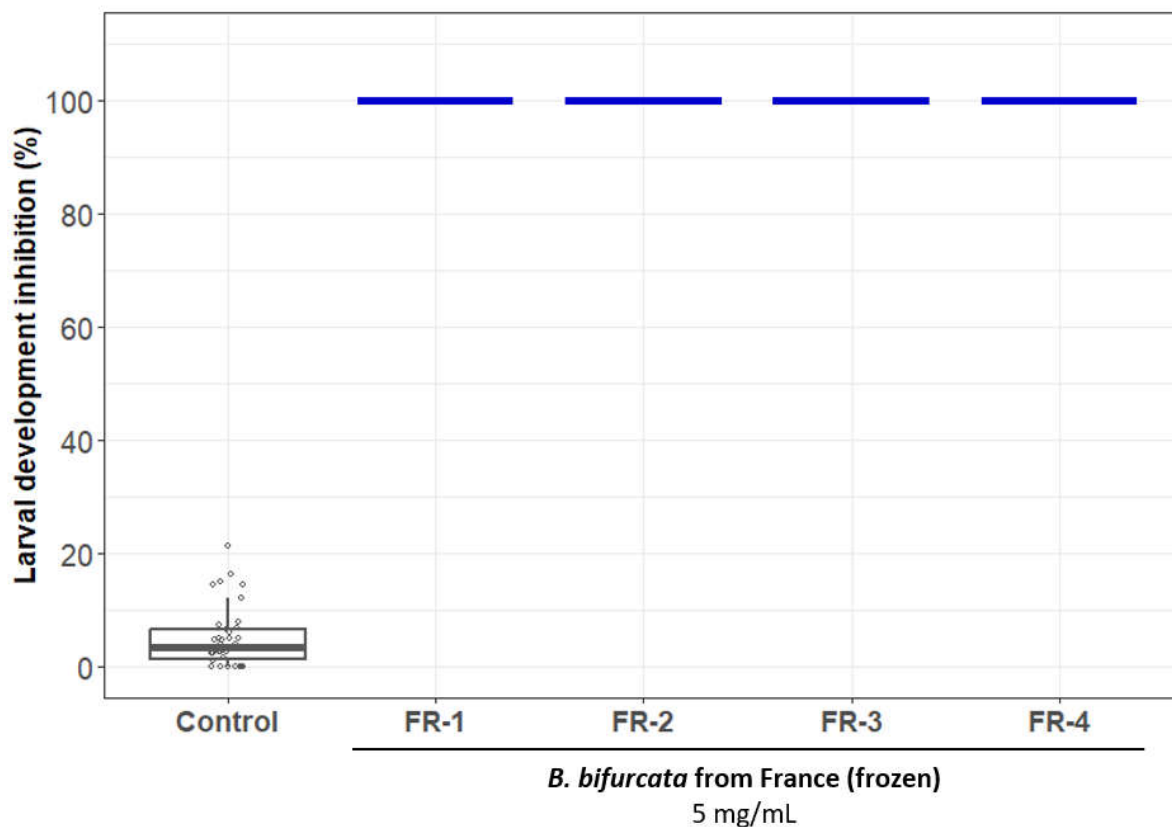

**Figure S1.** Comparison of different batches of *B. bifurcata* from France (frozen) for the inhibition of the larval development of *H. polygyrus bakeri*. Percentage inhibition of development of *H. polygyrus bakeri*, from L1-L2 to L3, in presence of water (control), or different batches of *B. bifurcata* at 5 mg/mL. The algae from France were collected in 2019 (FR-1) and 2021 (FR-2, FR-3, FR-4) and were frozen either directly (FR-2), after 24 h at + 4 °C (FR-3), or after 48 h at + 4 °C (FR-1 and FR-3). Results are from at least three independent experiments, with  $n = 6$  per sample each time.

**Table S1.** Mass evaluation of the different organic extractions performed on the two algal batches of *B. bifurcata*, frozen from France and dried from Portugal. These results are obtained from 2 g of freeze-dried aqueous extract.

|                                                                                     |         | Algae frozen from   | Algae dried from    |
|-------------------------------------------------------------------------------------|---------|---------------------|---------------------|
| Solvent use                                                                         |         | France              | Portugal            |
| Mean of the mass<br>after extraction (mg)<br>(percentage of initial<br>biomass (%)) | Heptane | 9.33 mg<br>(0.47%)  | 10.13 mg<br>(0.51%) |
|                                                                                     | EtOAc   | 32.10 mg<br>(1.61%) | 47.9 mg<br>(2.40%)  |
|                                                                                     | BuOH    | 61.70 mg<br>(3.09%) | 52.47 mg<br>(2.62%) |

Results are from three independent experiments, with  $n = 6$  per sample each time.
